# Supplementary material for: Engineering multiple species-like genetic incompatibilities in insects
Source: PubMed Central journal article supplement (PMC7478965; doi:10.1038/s41467-020-18348-1), 2020-09-08
Supplement: 41467_2020_18348_MOESM1_ESM.pdf [file 41467_2020_18348_MOESM1_ESM.pdf]

1 **Supplementary Information for:**

2

3 **Engineering multiple species-like genetic incompatibilities in insects**

4

5

6 **Maselko et al.**

7

8

9 **This PDF file includes:**

10

11       Supplementary Figures 1 to 10

12       Supplementary Tables 1 to 4

13       References

14

15

16

17

18

19

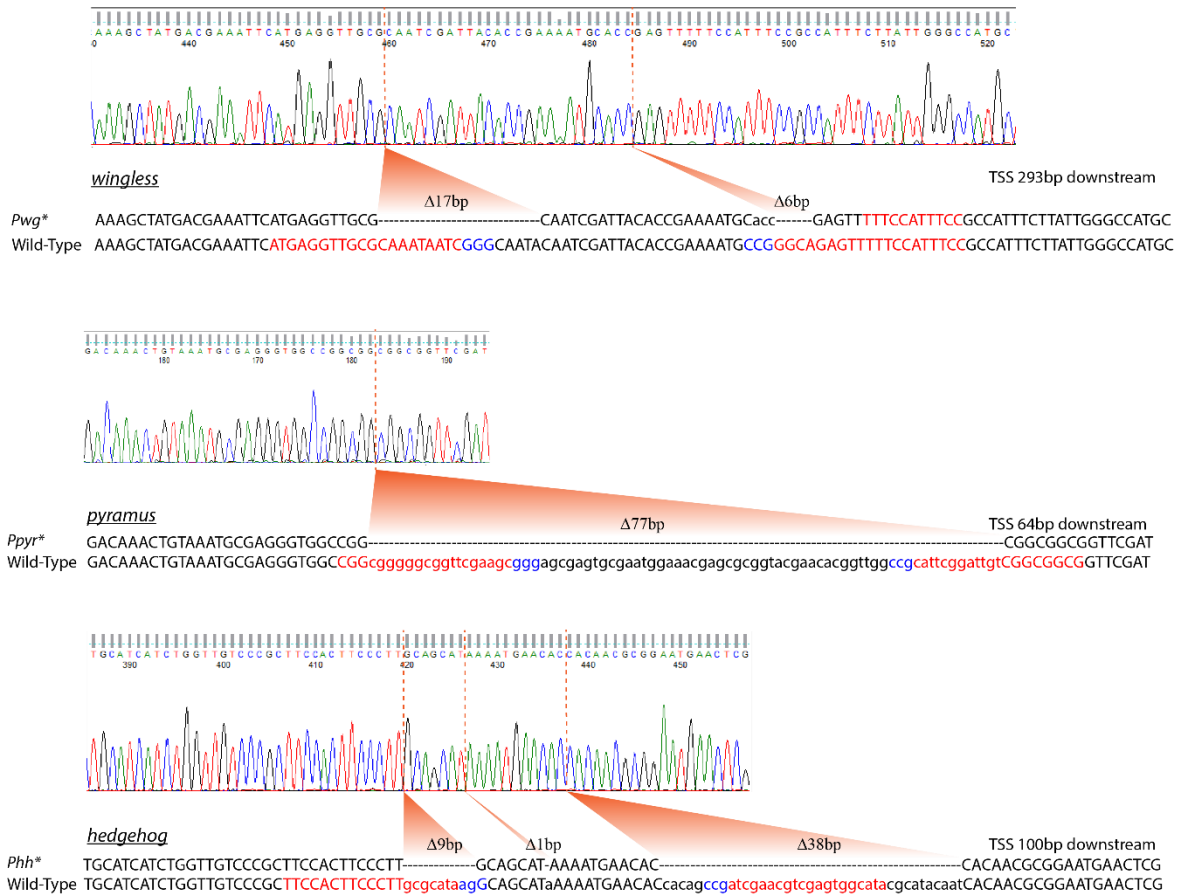

20

21 **Supplementary Figure 1. Promoter mutation characterization.** Promoter mutant sequencing traces and  
 22 alignments to wild-type promoters. Targeted protospacers indicated in red and PAMs indicated in blue.

23

24

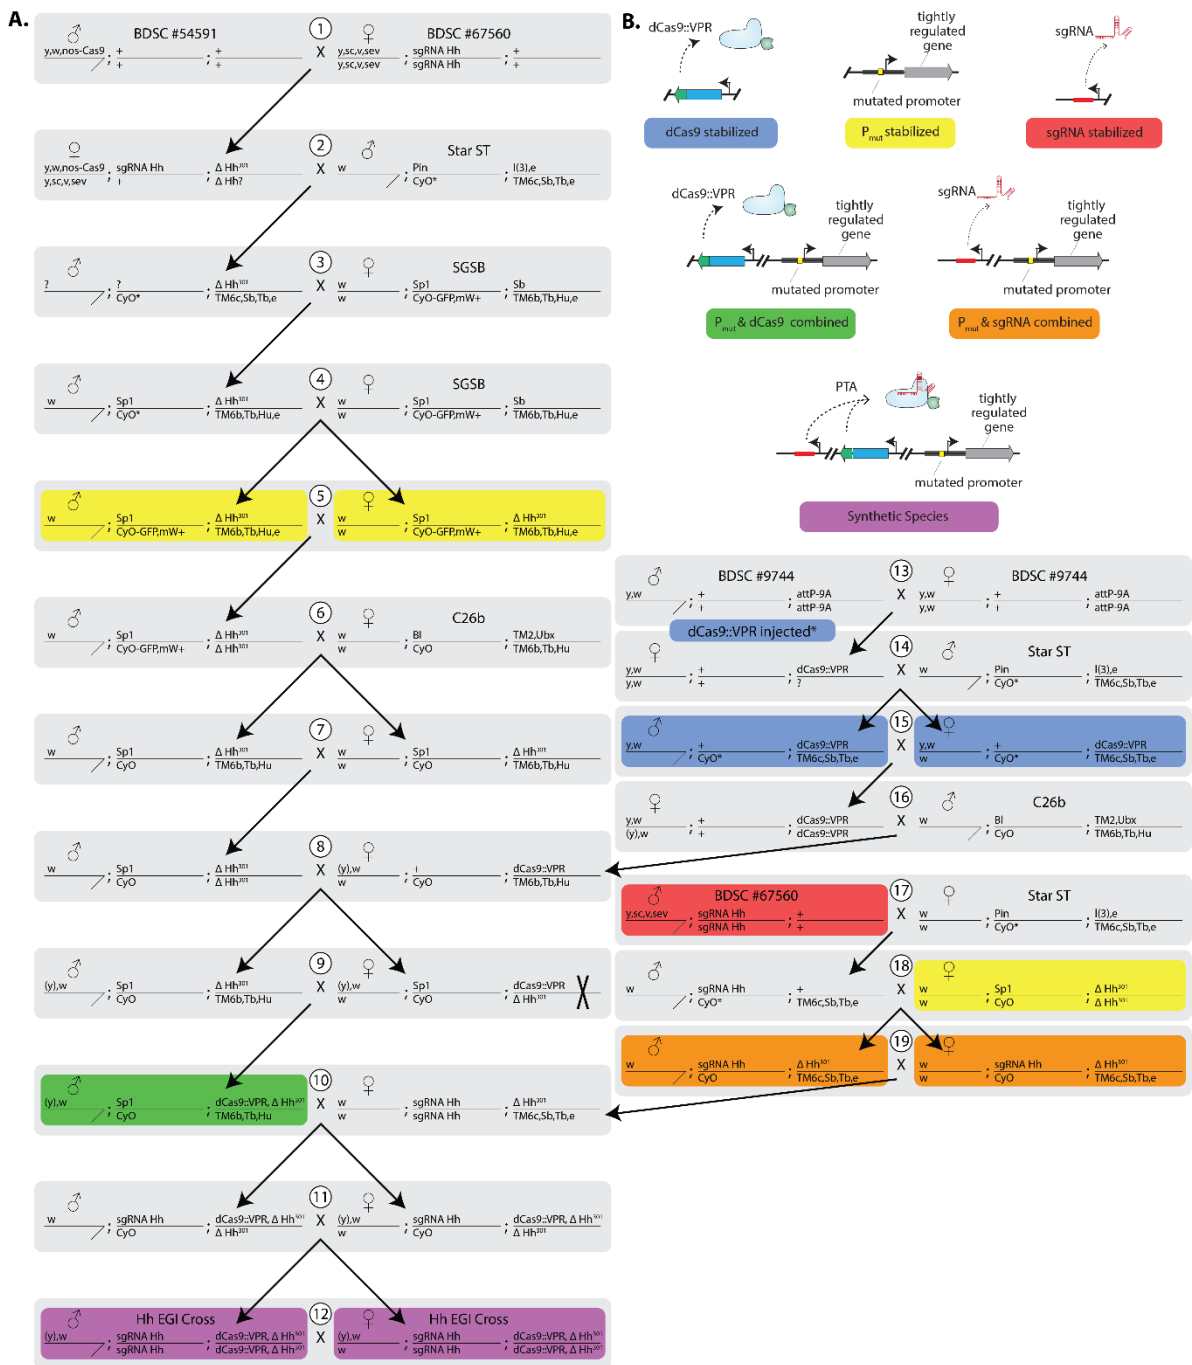

**Supplementary Figure 2. Crossing strategy to produce *hh*-EGI flies.** (A.) Genotypes and sex of flies involved in crosses required to bring together EGI components. Crosses are indexed with numbered white circles. ‘X’ designates a recombination event required in the female parent of cross #9. The female from cross #18 resulted from cross #7 (not cross #5). Embryos from cross #13 were injected with promoter::dCas9::VPR constructs and  $\Phi C31$  integrase. Question mark denotes a chromosome genotype that was not verified. (B.) Illustrated and color-coded genotypes of key intermediates. BDSC #54591, BDSC #67560, and BDSC #9744 were purchased from the Bloomington Drosophila Stock Center. Star ST, SGSB, and C26b are balancer strains.

25

26

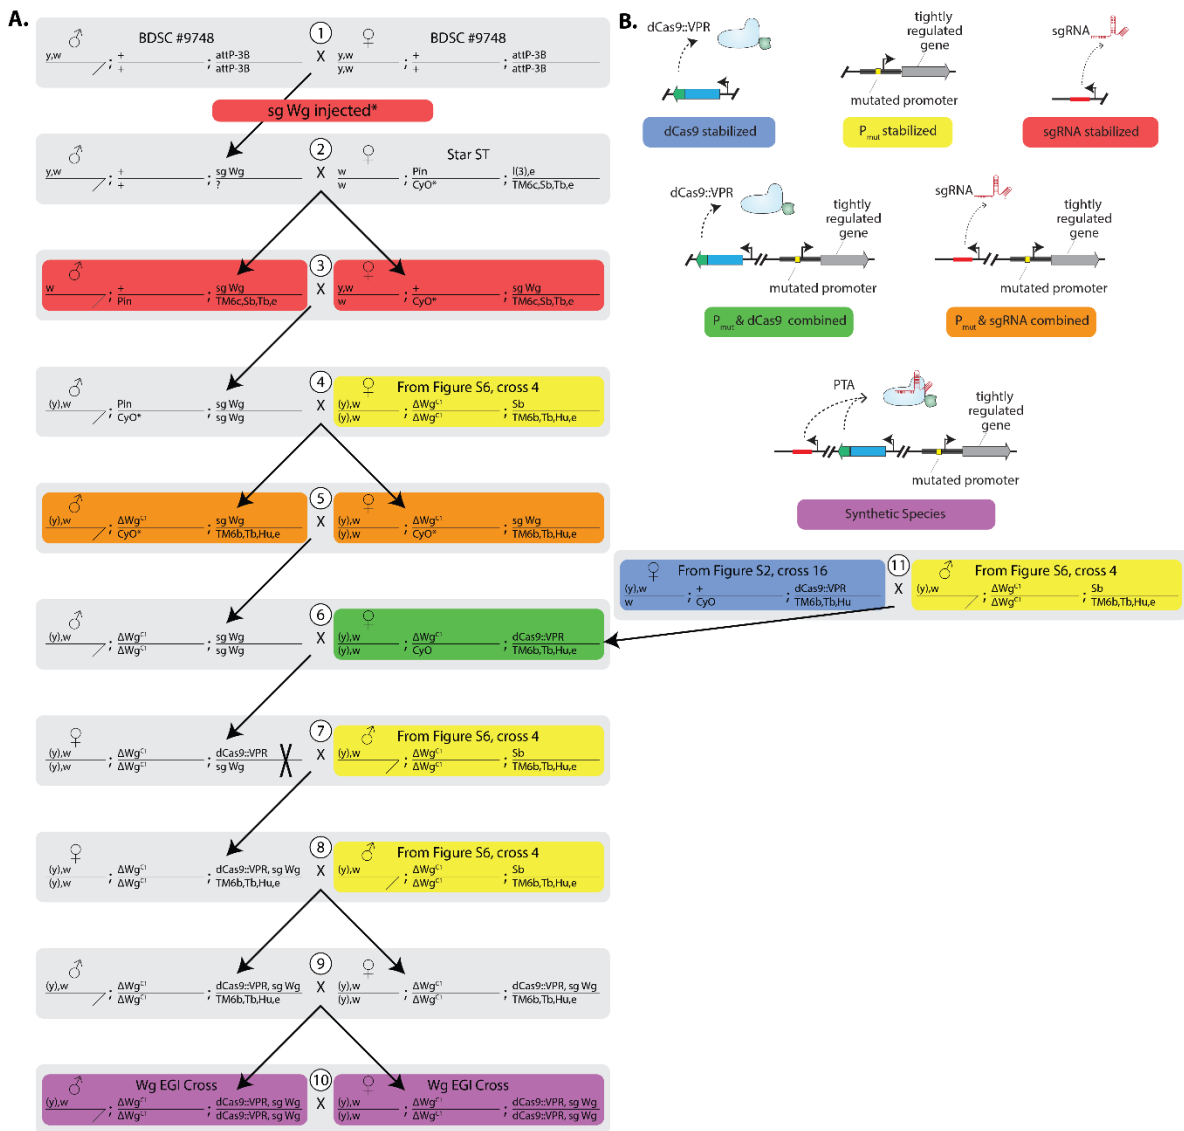

**Supplementary Figure 3. Crossing strategy to produce *wg*-EGI flies.** (A.) Genotypes and sex of flies involved in crosses required to bring together EGI components. Crosses are indexed with numbered white circles. 'X' designates a recombination event required in the female parent of cross #7. Embryos from cross #1 were injected with a sgRNA-*wg* construct and  $\Phi$ C31 integrase. Question mark denotes a chromosome genotype that was not verified. The males in crosses #7, 8, and 11 and the female in cross #4 are offspring from Supplementary Figure 6, cross #4. The female in cross #11 is offspring from Supplementary Figure 2, cross #16. (B.) Illustrated and color-coded genotypes of key intermediates. BDSC #9748 was purchased from the Bloomington Drosophila Stock Center. Star ST is a balancer strain.

27

28

29

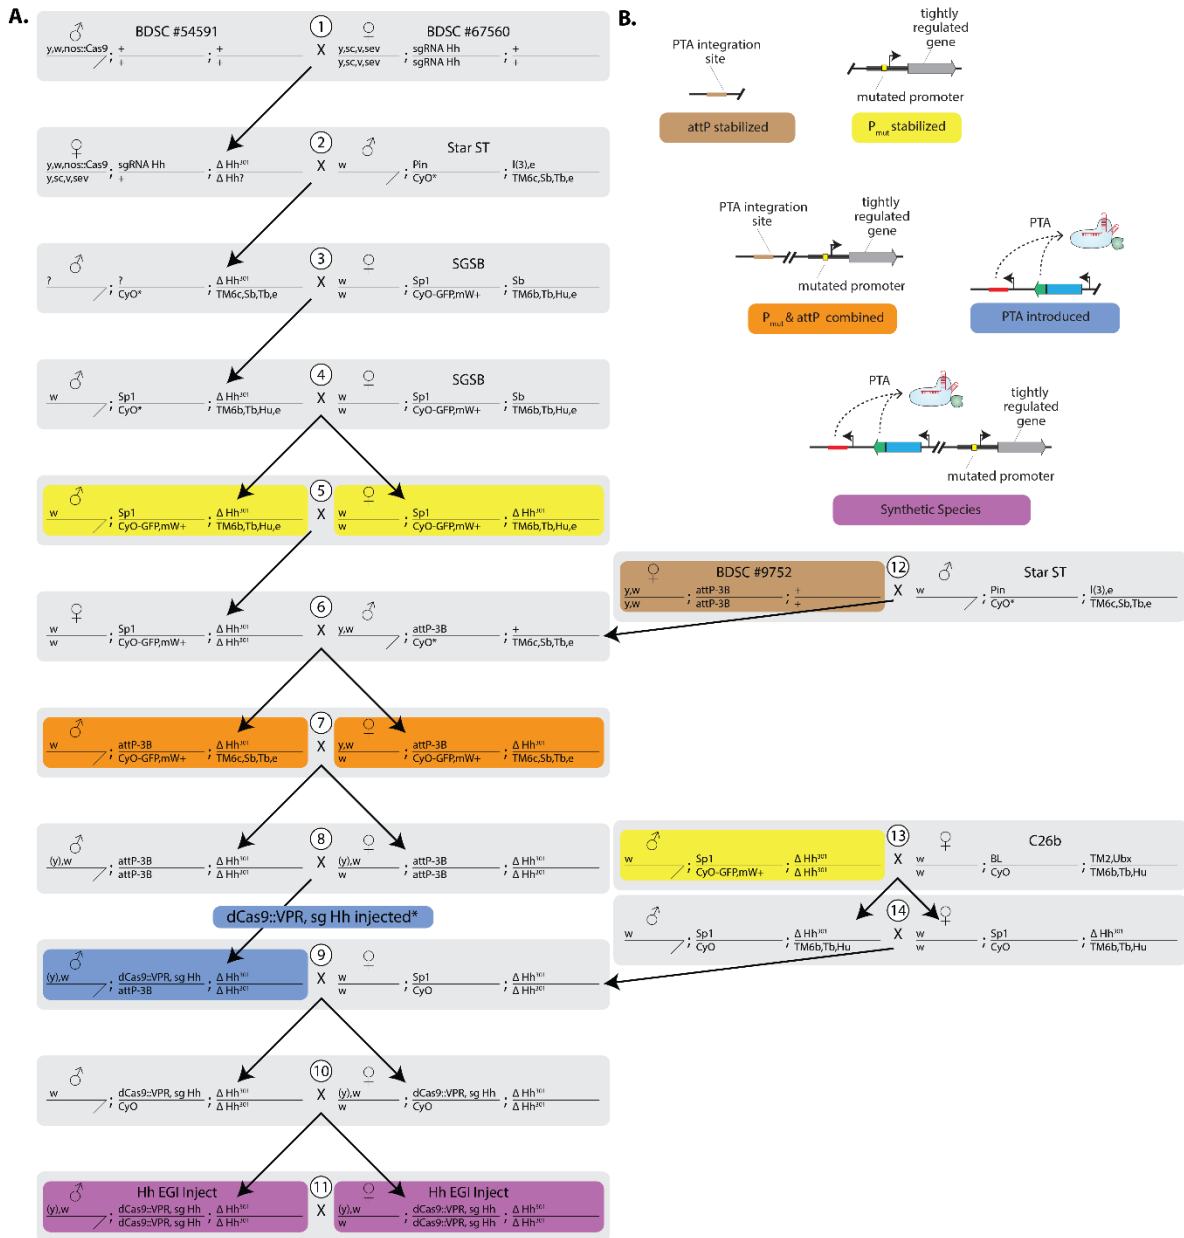

**Supplementary Figure 4. Rejection strategy to produce *hh*-EGI flies.** (A.) Genotypes and sex of flies involved in crosses required to bring together EGI components. Crosses are indexed with numbered white circles. Embryos from cross #8 were injected with promoter::dCas9::VPR + sgRNA-*hh* constructs and ΦC31 integrase. Question mark denotes a chromosome genotype that was not verified. (B.) Illustrated and color-coded genotypes of key intermediates. BDSC #54591, BDSC #67560, and BDSC #9752 were purchased from the Bloomington Drosophila Stock Center. Star ST, SGSB, and C26b are balancer strains.

30

31

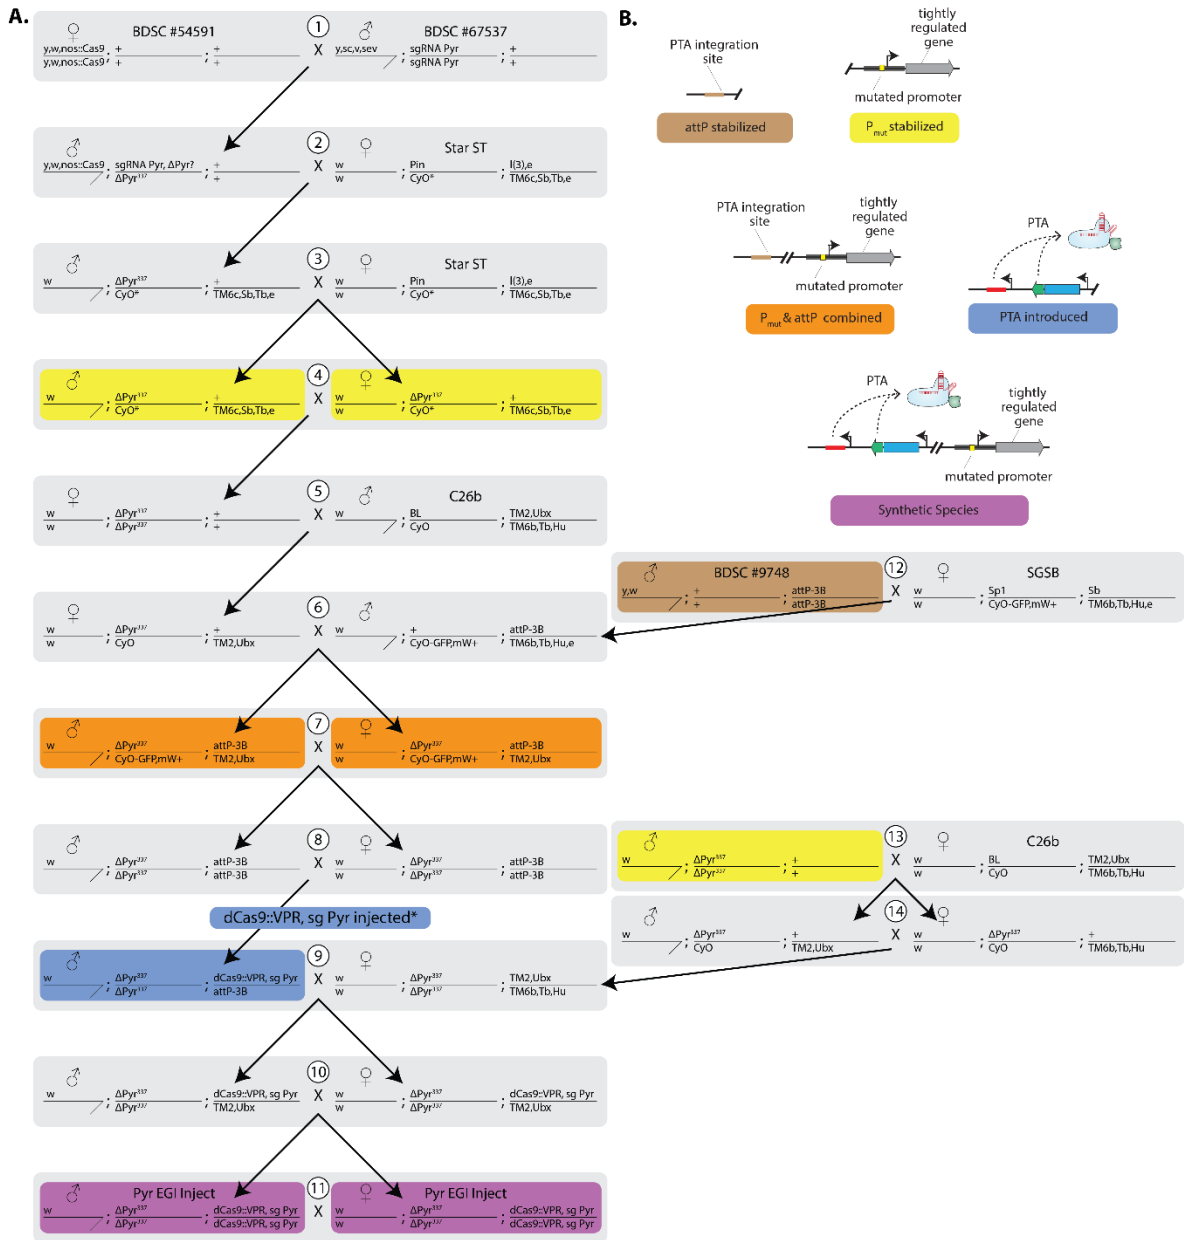

**Supplementary Figure 5. Reinjection strategy to produce *pyr*-EGI flies.** (A.) Genotypes and sex of flies involved in crosses required to bring together EGI components. Crosses are indexed with numbered white circles. Embryos from cross #8 were injected with promoter::dCas9:VPR + sgRNA-*pyr* constructs and ΦC31 integrase. Question mark denotes a chromosome genotype that was not verified. (B.) Illustrated and color-coded genotypes of key intermediates. BDSC #54591, BDSC #67537, and BDSC #9748 were purchased from the Bloomington Drosophila Stock Center. Star ST, SGSB, and C26b are balancer strains.

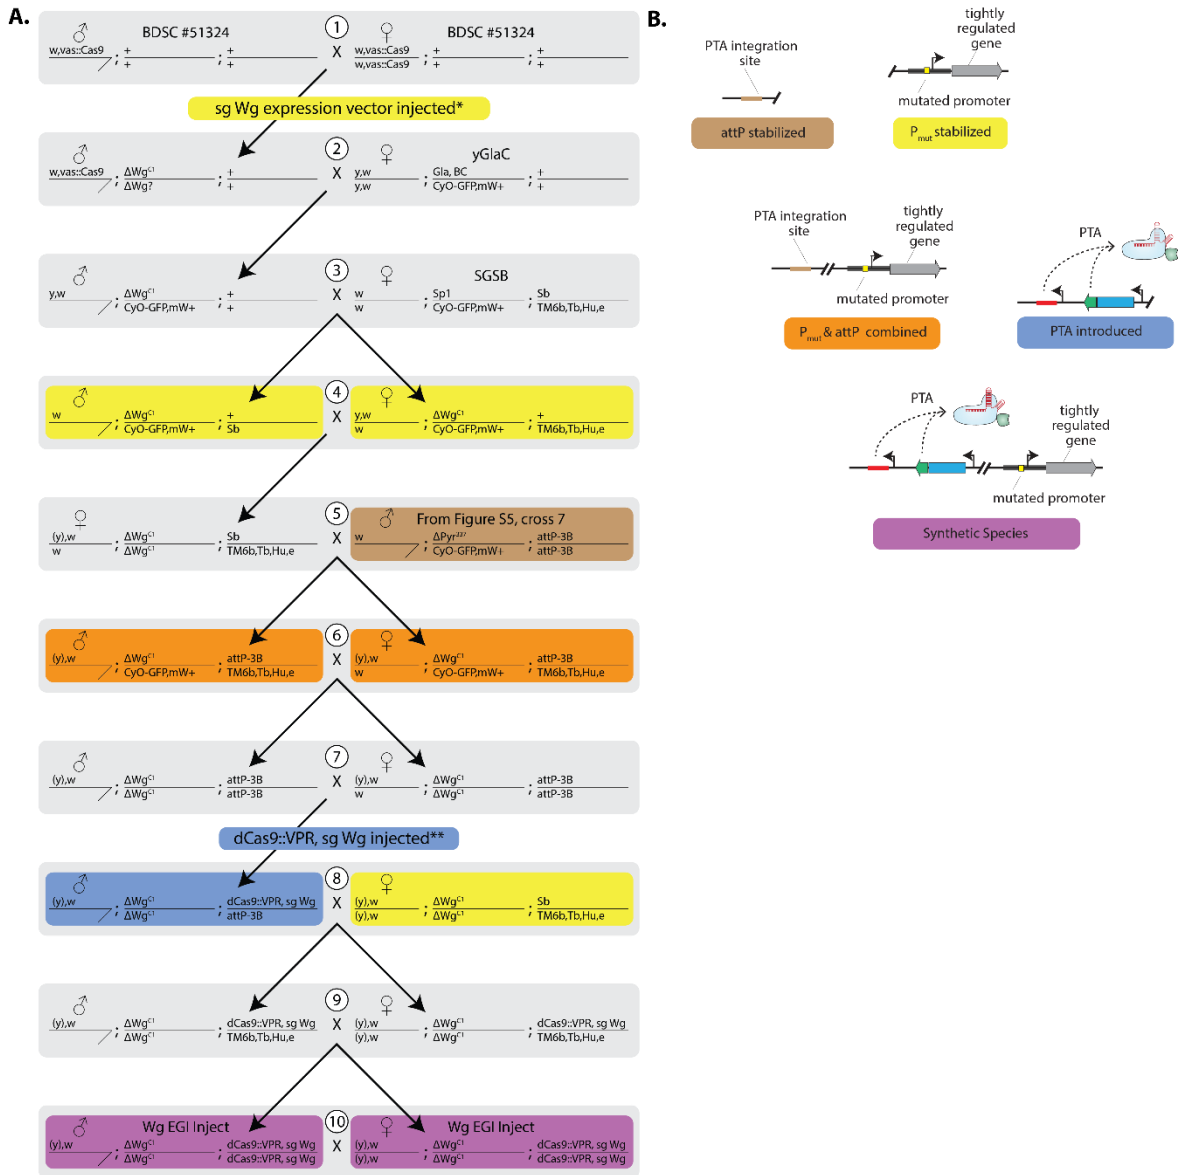

**Supplementary Figure 6. Reinjection strategy to produce *wg*-EGI flies.** (A.) Genotypes and sex of flies involved in crosses required to bring together EGI components. Crosses are indexed with numbered white circles. Embryos from cross #1 were injected with the sgRNA-*wg* expression construct. Embryos from cross #7 were injected with promoter::dCas9::VPR + sgRNA-*wg* constructs and  $\Phi$ C31 integrase. Question mark denotes a chromosome genotype that was not verified. The male in cross #5 is offspring from Supplementary Figure 5, cross #7. (B.) Illustrated and color-coded genotypes of key intermediates. BDSC #51324 was purchased from the Bloomington Drosophila Stock Center. *yGlaC* and *SGSB* are balancer strains.

34

35

36

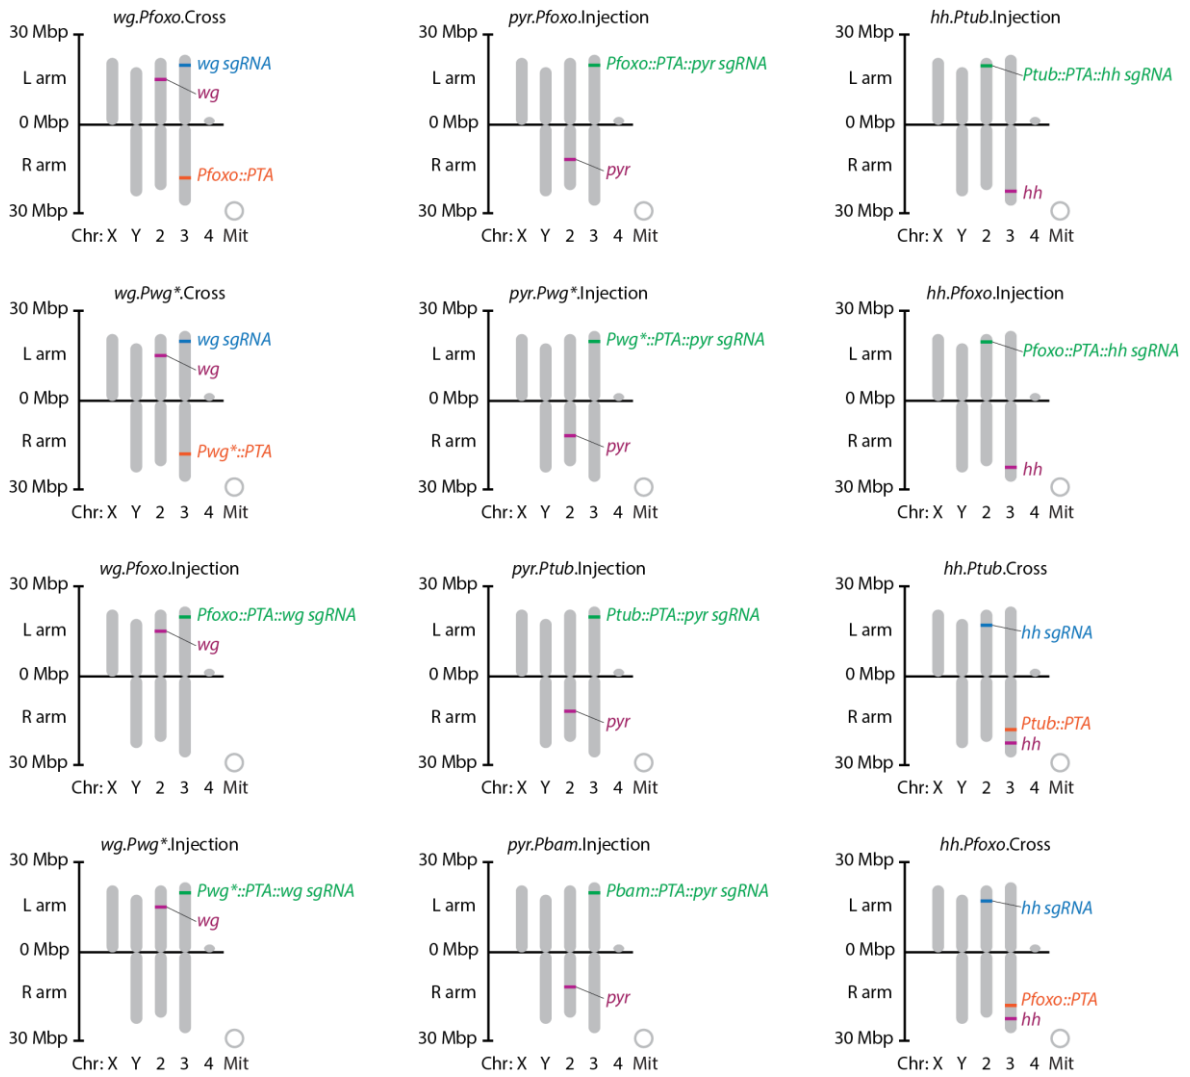

**Supplementary Figure 7: Chromosomal maps of all EGI strains reported in this work.**

37

38



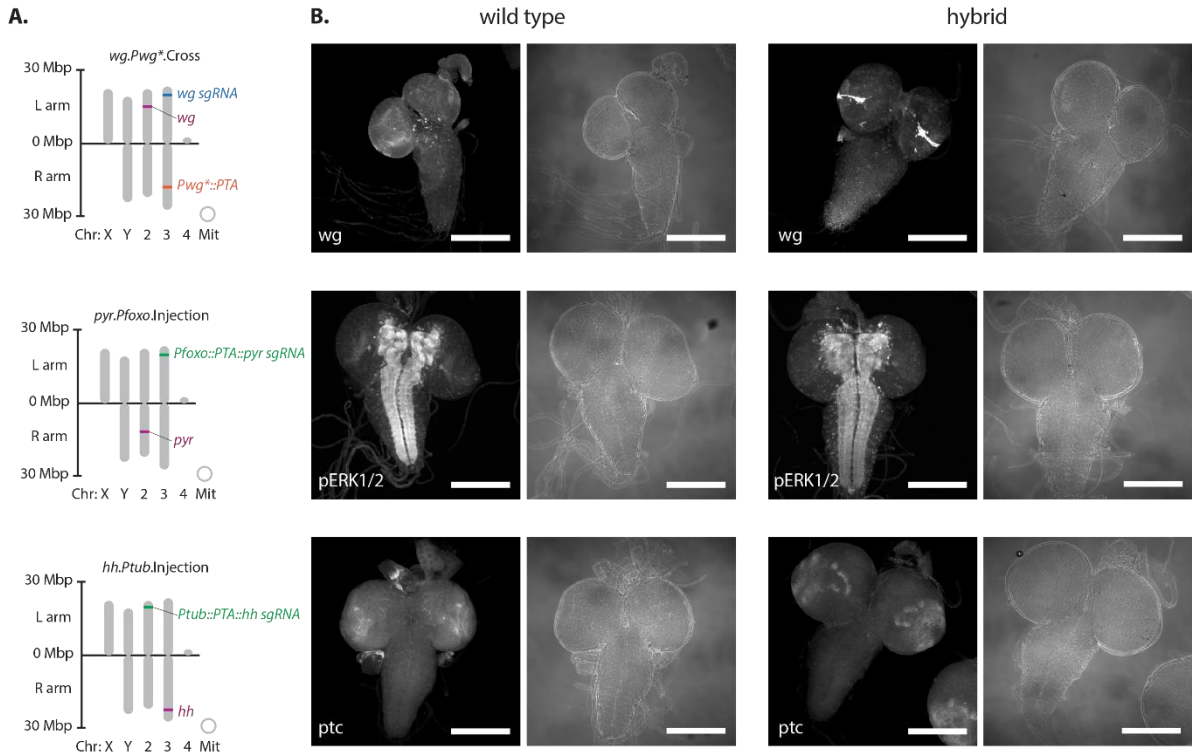

**Supplementary Figure 8: Immunohistochemistry of dissected brains.** (A.) Chromosomal locations of genome alterations for EGI strains whose hybrid offspring were analysed by immunohistochemistry. EGI strains illustrated here correspond to those used in Figure 3. (B.) Immunofluorescence staining of 3<sup>rd</sup> instar larval brains from wild-type (left) or hybrid (right) showing over- or ectopic-expression of targeted signalling pathways. Grayscale images show antibody staining for proteins encoded by lethal overexpression target (*wingless*, top) or downstream signalling pathway components (p-*ERK1/2*, middle and *patched*, bottom). Corresponding brightfield images of the brains to the right. Scale bar = 200  $\mu$ m. Images are representative of at least six independent biological replicates for each strain.

39

40

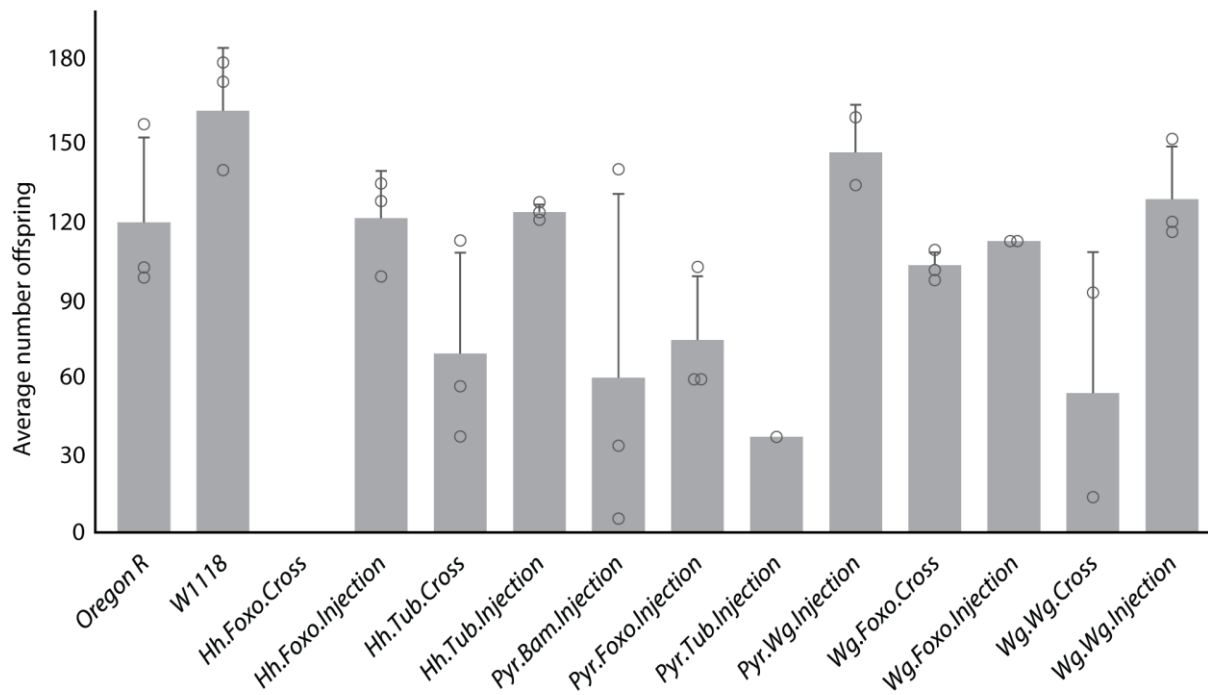

41

42 **Supplementary Figure 9: Fecundity of EGI and WT strains when self-mated.** Average adult offspring resulting  
 43 from three matings between two males and three females of the same strain. Strains are in the same order and  
 44 contain the same data as in the mating compatibility assay (Figure 4). Error bars denote one standard deviation  
 45 across three replicates, unless otherwise stated. Hh.Foxo.Cross had no replicates. Pyr.Tub.Injection contained  
 46 only 1 replicate. Pyr.Wg.Injection, Wg.Foxo.Injection, and Wg.Wg.Cross contained 2 replicates each.  
 47

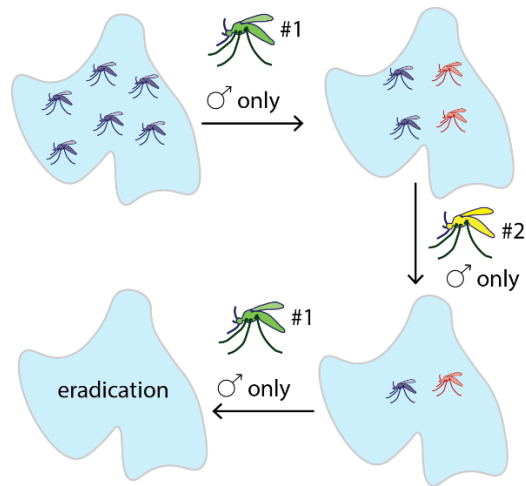

**Supplementary Figure 10: Iterative release scheme for negatively correlating cross resistance.** Purple denotes wild-type pests, green and yellow denote mutually-incompatible EGI strains, for which only males would be released. Orange denotes resistant 'escapees', which inherit half of their genome from the previously released biocontrol EGI strain.

48

49

**Supplementary Table 1: Promoter Target Sequences**

| <b>Target Promoter</b> | <b>Target 1</b>           | <b>Target 2</b>          | <b>Reference</b> |
|------------------------|---------------------------|--------------------------|------------------|
| <i>hh</i>              | TATGCCACTCGACGTTTCGAT CGG | TTCCAATTCCCTTGCGCATA AGG | 1                |
| <i>hid</i>             | CACATGCACGTGCATGA AGG     | CATGCACGTGCATGAAGG AGG   | 2                |
| <i>pyr</i>             | CGGCGGGGGCGGTTTCGAAGC GGG | CGCCGCCGACAATCCGAATG CGG | 1                |
| <i>upd1</i>            | GCGAGCTGAGCGGCCTCTGC CGG  | TGCCGACGAGCGGTACGCCA TGG | 1                |
| <i>upd2</i>            | CAGCAAGCGATTGTGATAGT TGG  | TGCTGATGCTGATCGCTCCA CGG | 1                |
| <i>upd3</i>            | TGGAGTGGAGTGTGTGGAG TGG   | GGAGTTCAGTCAGTCTCCGC CGG | 1                |
| <i>vn</i>              | AGCATTCAACGTATCTCA CGG    | GTGCCGAAGATATTCGAACA CGG | 1                |
| <i>wg</i>              | ATGAGGTTGCGCAAATAATC GGG  | GGAAATGGAAAACTCTGCC CGG  | 3                |

**Supplementary Table 2: *D. melanogaster* strains used in this study**

| Strain                                          | Description                                                                                                           | Reference  | BDSC # |
|-------------------------------------------------|-----------------------------------------------------------------------------------------------------------------------|------------|--------|
| Wild Type                                       | Oregon R                                                                                                              | 4          | N/A    |
| White Eye                                       | w <sup>1118</sup>                                                                                                     | 5          | 5905   |
| 3 <sup>rd</sup> Chr. attP9                      | y <sup>1</sup> w <sup>1118</sup> ; ; PBac{y[+]-attP-9A}VK00027                                                        | 6          | 9744   |
| 3 <sup>rd</sup> Chr. attP3                      | y <sup>1</sup> w <sup>1118</sup> ; PBac{y[+]-attP-3B}VK00031                                                          | 6          | 9748   |
| 2 <sup>nd</sup> Chr. attP3                      | y <sup>1</sup> w <sup>1118</sup> ; PBac{y[+]-attP-3B}VK00037                                                          | 6          | 9752   |
| Vas-Cas9                                        | w[1118]; PBac{y[+mDint2]=vas-Cas9}VK00027                                                                             | 7          | 51324  |
| 2 <sup>nd</sup> Chr. attP3, ΔHH <sup>301</sup>  | w <sup>1118</sup> ; PBac{y[+]-attP-3B}VK00037; ΔHH <sup>301</sup>                                                     | this study |        |
| 3 <sup>rd</sup> Chr. attP3, Δpyr <sup>337</sup> | w <sup>1118</sup> ; Δpyr <sup>337</sup> ; PBac{y[+]-attP-3B}VK00031                                                   | this study |        |
| 3 <sup>rd</sup> Chr. attP3, ΔWg <sup>C1</sup>   | w <sup>1118</sup> ; ΔWg <sup>C1</sup> ; PBac{y[+]-attP-3B}VK00031                                                     | this study |        |
| 2 <sup>nd</sup> Chr. bal, ΔHH <sup>301</sup>    | w <sup>1118</sup> ; Sp1/ CyO; ΔHH <sup>301</sup>                                                                      | this study |        |
| 3 <sup>rd</sup> Chr. bal, Δpyr <sup>337</sup>   | w <sup>1118</sup> ; Δpyr <sup>337</sup> ; TM2/ TM6b, Tb, Hu                                                           | this study |        |
| 3 <sup>rd</sup> Chr. bal, ΔWg <sup>C1</sup>     | w <sup>1118</sup> ; ΔWg <sup>C1</sup> ; Sb/ TM6b, Tb, Hu                                                              | this study |        |
| hh.FoxO.cross                                   | w <sup>1118</sup> ; P{y[+t7.7] v[+t1.8]=TOE.GS00191}attP40; P{pFoxo::dCas9-VPR}attP-9A, ΔHH <sup>301</sup>            | this study |        |
| hh.FoxO.injection                               | y <sup>1</sup> w <sup>1118</sup> ; P{pFoxo::dCas9-VPR::sgRNA <sup>HH</sup> }attP-3B; ΔHH <sup>301</sup>               | this study |        |
| hh.Tub.cross                                    | w <sup>1118</sup> ; P{y[+t7.7] v[+t1.8]=TOE.GS00191}attP40; P{pTub::dCas9-VPR}attP-9A, ΔHH <sup>301</sup>             | this study |        |
| hh.Tub.injection                                | y <sup>1</sup> w <sup>1118</sup> ; P{pTub::dCas9-VPR::sgRNA <sup>HH</sup> }attP-3B; ΔHH <sup>301</sup>                | this study |        |
| pyr.Bam.injection                               | w <sup>1118</sup> ; Δpyr <sup>337</sup> ; P{pBam::dCas9-VPR::sgRNA <sup>Pyr</sup> }attP-3B                            | this study |        |
| pyr.FoxO.injection                              | w <sup>1118</sup> ; Δpyr <sup>337</sup> ; P{pFoxo::dCas9-VPR::sgRNA <sup>Pyr</sup> }attP-3B                           | this study |        |
| pyr.Tub.injection                               | w <sup>1118</sup> ; Δpyr <sup>337</sup> ; P{pTub::dCas9-VPR::sgRNA <sup>Pyr</sup> }attP-3B                            | this study |        |
| pyr.Wg.injection                                | w <sup>1118</sup> ; Δpyr <sup>337</sup> ; P{pΔWg <sup>C1</sup> ::dCas9-VPR::sgRNA <sup>Pyr</sup> }attP-3B             | this study |        |
| wg.FoxO.cross                                   | w <sup>1118</sup> ; P{sgRNA <sup>Wg</sup> }attP-3B, ΔWg <sup>C1</sup> ; P{pFoxo::dCas9-VPR}attP-9A                    | this study |        |
| wg.FoxO.injection                               | y <sup>1</sup> w <sup>1118</sup> ; ΔWg <sup>C1</sup> ; P{pFoxo::dCas9-VPR::sgRNA <sup>Wg</sup> }attP-3B               | this study |        |
| wg.Wg.cross                                     | w <sup>1118</sup> ; PBac{sgRNA <sup>Wg</sup> }attP-3B, ΔWg <sup>C1</sup> ; P{pΔWg <sup>C1</sup> ::dCas9-VPR}attP-9A   | this study |        |
| wg.Wg.injection                                 | y <sup>1</sup> w <sup>1118</sup> ; ΔWg <sup>C1</sup> ; P{pΔWg <sup>C1</sup> ::dCas9-VPR::sgRNA <sup>Wg</sup> }attP-3B | this study |        |
| nos-Cas9                                        | y <sup>1</sup> M{w[+mC]=nos-Cas9.P}ZH-2A, w <sup>*</sup>                                                              | 8          | 54591  |
| hh sgRNA                                        | y <sup>1</sup> sc <sup>*</sup> v <sup>1</sup> ; P{y[+t7.7] v[+t1.8]=TOE.GS00191}attP40                                | 1          | 67560  |
| hid sgRNA                                       | y <sup>1</sup> w <sup>1118</sup> ; PBac{sgRNA <sup>Hid</sup> }attP-3B                                                 | this study |        |
| pyr sgRNA                                       | y <sup>1</sup> sc <sup>*</sup> v <sup>1</sup> ; P{y[+t7.7] v[+t1.8]=TOE.GS00085}attP40                                | 1          | 67537  |
| upd1 sgRNA                                      | y <sup>1</sup> sc <sup>*</sup> v <sup>1</sup> ; P{y[+t7.7] v[+t1.8]=TOE.GS00169}attP40                                | 1          | 67555  |
| upd2 sgRNA                                      | y <sup>1</sup> sc <sup>*</sup> v <sup>1</sup> ; P{y[+t7.7] v[+t1.8]=TOE.GS00171}attP40                                | 1          | 67556  |
| upd3 sgRNA                                      | y <sup>1</sup> sc <sup>*</sup> v <sup>1</sup> ; P{y[+t7.7] v[+t1.8]=TOE.GS00129}attP40                                | 1          | 67546  |
| vn sgRNA                                        | y <sup>1</sup> sc <sup>*</sup> v <sup>1</sup> ; P{y[+t7.7] v[+t1.8]=TOE.GS00144}attP40                                | 1          | 67548  |
| wg sgRNA                                        | y <sup>1</sup> w <sup>1118</sup> ; ; PBac{sgRNA <sup>Wg</sup> }attP-3B                                                | this study |        |
| pTub::dCas9-VPR                                 | y <sup>1</sup> w <sup>1118</sup> ; ; P{pTub::dCas9-VPR}attP-9A                                                        | this study |        |
| pFoxo::dCas9-VPR                                | y <sup>1</sup> w <sup>1118</sup> ; ; P{pFoxo::dCas9-VPR}attP-9A                                                       | this study |        |
| pTub::dxCas9-VPR                                | y <sup>1</sup> w <sup>1118</sup> ; ; P{pTub::dxCas9-VPR}attP-9A                                                       | this study |        |
| pΔWg::dCas9-VPR                                 | y <sup>1</sup> w <sup>1118</sup> ; ; P{pΔWg <sup>C1</sup> ::dCas9-VPR}attP-9A                                         | this study |        |
| ΔWg                                             | w <sup>1118</sup> ; ΔWg <sup>C1</sup>                                                                                 | this study |        |
| ΔHH                                             | w <sup>1118</sup> ; ; ΔHH <sup>301</sup>                                                                              | this study |        |
| ΔPyr                                            | w <sup>1118</sup> ; ΔPyr <sup>337</sup>                                                                               | this study |        |

**Supplementary Table 3: Plasmids used in this study**

| Plasmid             | Integrated in Fly Strain                      | Description                                                                                    | Reference/ GenBank Accession # |
|---------------------|-----------------------------------------------|------------------------------------------------------------------------------------------------|--------------------------------|
| pMM7-1-1            | N/A                                           | pU6-BbsI-chiRNA targeting upstream wg promoter protospacer                                     | this study                     |
| pMM7-1-2            | N/A                                           | pU6-BbsI-chiRNA targeting downstream wg promoter protospacer                                   | this study                     |
| pMM7-5-3            | wg sgRNA<br>wg.FoxO.cross                     | Expresses dual sgRNAs targeting Wg promoter                                                    | this study                     |
| pMM7-6-1            | N/A                                           | dCas9-VPR plasmid. Promoters cloned into NotI restriction site.                                | this study/<br>MT882253        |
| pMM7-6-2            | hh.FoxO.cross<br>wg.FoxO.cross<br>wg.Wg.cross | Foxo promoter driving dCas9-VPR expression                                                     | this study                     |
| pMM7-6-3            | pTub::dCas9-VPR<br>hh.Tub.cross               | Short tubulin alpha promoter driving dCas9-VPR expression                                      | this study                     |
| pMM7-6-4            | pΔWg <sup>C1</sup> ::dCas9-VPR<br>wg.Wg.cross | Mutated Wg promoter driving dCas9-VPR expression                                               | this study                     |
| pMM7-9-1            | N/A                                           | dxCas9-VPR plasmid. Promoters cloned into NotI restriction site.                               | this study/<br>MT882254        |
| pMM7-9-4            | pTub::dxCas9-VPR                              | Short tubulin alpha promoter driving dxCas9-VPR expression                                     | this study                     |
| pMM7-6-2-HH         | hh.FoxO.injection                             | Foxo promoter driving dCas9-VPR expression. Dual sgRNAs targeting HH promoter.                 | this study                     |
| pMM7-6-2-Pyr        | pyr.FoxO.injection                            | Foxo promoter driving dCas9-VPR expression. Dual sgRNAs targeting Pyr promoter.                | this study                     |
| pMM7-6-2-Wg         | wg.FoxO.injection                             | Foxo promoter driving dCas9-VPR expression. Dual sgRNAs targeting Wg promoter.                 | this study                     |
| pMM7-6-3-HH         | hh.Tub.injection                              | Short tubulin alpha promoter driving dCas9-VPR expression. Dual sgRNAs targeting HH promoter.  | this study                     |
| pMM7-6-3-Pyr        | pyr.Tub.injection                             | Short tubulin alpha promoter driving dCas9-VPR expression. Dual sgRNAs targeting Pyr promoter. | this study                     |
| pMM7-6-4-Pyr        | pyr.Wg.injection                              | Mutated Wg promoter driving dCas9-VPR expression. Dual sgRNAs targeting Pyr promoter.          | this study                     |
| pMM7-6-4-Wg         | wg.Wg.injection                               | Mutated Wg promoter driving dCas9-VPR expression. Dual sgRNAs targeting Wg promoter.           | this study                     |
| pMM7-6-5-Pyr        | pyr.Bam.injection                             | Bam promoter driving dCas9-VPR expression. Dual sgRNAs targeting Pyr promoter.                 | this study                     |
| pU6-BbsI-chiRNA     | N/A                                           | sgRNA expression plasmid                                                                       | 7                              |
| pAct:dCas9-VPR      | N/A                                           | Source of dCas9-VPR                                                                            | 9                              |
| pCFD4               | N/A                                           | sgRNA expression plasmid                                                                       | 8                              |
| p{CFD4-3xP3::DsRed} | N/A                                           | sgRNA expression plasmid                                                                       | 10                             |

**Supplementary Table 4: Primer Sequences**

| Name            | Sequence (5' -> 3')                                               | Notes                                                      |
|-----------------|-------------------------------------------------------------------|------------------------------------------------------------|
| MM_2step_dCas_F | ctggtctagagcccgggGCTAGCCAATTCTATATTCTAAAAACA<br>C                 | Amplifies dCas9-VPR from pAct:dCas9-VPR                    |
| MM_2step_dCas_R | ctgattatgatctagagtcgGTCAAACAGAGATGTGT                             |                                                            |
| MM_bgl_SVT_F    | tctggtctagagcccgggGCTAGCcgactctagatcataatcag                      | Amplifies SV40 terminator from ph-Stinger                  |
| MM_bgl_SVT_R    | cggggtaccggcgccggcgtaagatacattgatgagtttg                          |                                                            |
| MM_pFoxo_F      | ACGTAAGTACTGTCTGCAGCGTAAGCTTCGTACGTAGC<br>gtcaaattggtgtgattac     | Amplifies Foxo promoter and 5'UTR                          |
| MM_pFoxo_R      | AGCCAATGGAGTACTTCTGTCCATtttgaagattGC<br>tccaattcgcttttattcg       |                                                            |
| MM_sptuba_F2    | GCAGCGTAAGCTTCGTACGTAGCgaccgtctcaaagtactgctT                      | Amplifies portion of tubulin promoter and 5' UTR           |
| MM_sptuba_R     | GGAGTACTTCTGTCCATtttgaagattGCattggaagtgtttcacacgc<br>gac          |                                                            |
| MM_pWgdCas_F    | ACGTAAGTACTGTCTGCAGCGTAAGCTTCGTACGTAGC<br>cagctcctgttggtgac       | Amplifies wingless promoter and 5' UTR                     |
| MM_pWgdCas_R    | AGCCAATGGAGTACTTCTGTCCATtttgaagattGC<br>gctgatcgggttatctgttc      |                                                            |
| MM_pBam_F       | ACGTAAGTACTGTCTGCAGCGTAAGCTTCGTACGTAGC<br>actctaaaacgtaaagaac     | Amplifies bam promoter and 5'UTR                           |
| MM_pBam_R       | AGCCAATGGAGTACTTCTGTCCATtttgaagattGC<br>cttaagttaaatcacacaaa      |                                                            |
| MM_2wg_F        | AGATATCCGGGTGAACTTCG ATGAGGTTGCGCAAATAATC<br>GTTTTAGAGCTAGAAATAGC | Primers to clone wingless spacers into p{CFD4-3xP3::DsRed} |
| MM_2wg_R        | GCTATTTCTAGCTCTAAAAC GGCAGAGTTTTTCCATTTC<br>CGACGTAAATTGAAAATAG   |                                                            |
| MM_dmsgRNA_F    | tcttaGCGGCTCGAGGGTACAAGCCGAATTGATCCACTAG                          | Amplifies sgRNA cassettes.                                 |

|                            |                                           |                   |
|----------------------------|-------------------------------------------|-------------------|
| MM_dmsgRNA                 | TAGTGGATCTCTAGAGGTACATAATAAATACTGGCGAAAGC |                   |
| <u>Promoter sequencing</u> |                                           |                   |
| HH_F                       | CCAGGAGTCACACAATACAC                      | Hedghog promoter  |
| HH_R                       | GCGAATACGAATGCGAGTAT                      | Hedghog promoter  |
| Pyr_F                      | GAACGAACTGGCCCACTTGG                      | Pyramus promoter  |
| Pyr_R                      | CTGTAGCCGCGCAATGCACT                      | Pyramus promoter  |
| Wg_F                       | CGGAATGCCAAAGTGTGT                        | Wingless promoter |
| Wg_R                       | GCTAGTTATAGATCGGTTTCGATC                  | Wingless promoter |

Primers and gBlock to generate dXCas9-VPR

|             |                                                                                    |
|-------------|------------------------------------------------------------------------------------|
| MM_xCas1_F2 | ACGTAAGTACTGTCTGCAGCGTAAGCTTCGTACGTAGCGGCCGCaatcttataaaaATGGAC<br>AAGAAGTACTCCATTG |
| MM_xCas1_R  | GTAGGTGTCTTTGCTCAGTTGAAGCTTGGTATCTTCGGCCAGG<br>TCGAA                               |
| MM_xCas2_F  | TCCGATGGATTTGCCAACCCGGAACCTTCATTGATTCAGTTGATCCATG<br>ATGACTCTCTC                   |
| MM_xCas2_R  | CTCGTTACCTTTCTGCAGCACGCCCGCACTAGCGA                                                |
| MM_xCas3_F  | CGAATGCTCGCTAGTGCGGGCGTGCTGCAGAAAGGTAACGA<br>G                                     |
| MM_xCas3_R  | tgattatgatctagagtcggTCAAAACAGAGATGTGTCTGAAG                                        |
| MM_xCas4_F  | TTCGACACATCTCTGTTTTGAccgactctagatcataatc                                           |
| MM_xCas4_R  | ACACTAGTGGATCTCTAGAGGTACCCTCGAGCCGCTaagatacat<br>tgatgagttt                        |

55 MM\_gdXCas9  
56 ACCAAGCTTCAACTGAGCAAAGACACCTACGATGATGATCTCGACAATCTGCTGGCCAGATCGGGC  
57 ACCAGTACGCAGACCTTTTTTGGCGCAAAGAACCTGTCAGACGCCATTCTGCTGAGTGATATTCTG  
58 CGAGTGAACACGGAGATCACAAAGCTCCGCTGAGCGTAGTATGATCAAGCTCTATGATGAGCACC  
59 ACCAAGACTTGACTTTGCTGAAGGCCCTTGTGAGACAGCAACTGCCTGAGAAGTACAAGGAAATTTT  
60 CTTGATCAGTCTAAAAATGGCTACGCCGATACATTGACGGCGGAGCAAGCCAGGAGGAATTTTAC  
61 AAATTTATTAAGCCCCTTTGGAAAAAATGGACGGCACCGAGGAGCTGCTGGTAAAGCTTAACAGAG  
62 AAGATCTGTTGCGCAAACAGCGCACTTTGACAATGGAATCATCCCCACCAGATTCACCTGGGCGA  
63 ACTGCACGCTATCCTCAGGCGGCAAGAGGATTTCTACCCCTTTTTGAAAGATAACAGGGAAAAGATT  
64 GAGAAAATCCTCACATTTCCGATACCCTACTATGTAGGCCCCCTCGCCCGGGGAAATTCAGATTCCG  
65 GTGGATGACTCGAAATCAGAAGAAACCATCACTCCCTGGAACCTCGAGAAAGTCGTGGATAAGGG  
66 GGCCTTGCCAGTCCTTCATCGAAAGGATGACTAATTTGATAAAAATCTGCTAACGAAAAGGTGC  
67 TTCCTAAACTCTCTGCTGTACGAGTACTTCACAGTTTATAACGAGCTACCAAGGTCAAATACGTCA  
68 CAGAAGGGATGAGAAAGCCAGCATTCTGTCTGGAGATCAGAAGAAAGCTATCGTGGACCTCCTCTT  
69 CAAGACGAACCGAAAGTTACCGTGAACAGCTCAAAGAAGACTATTTCAAAAAGATTGAATGTTTC  
70 GACTCTGTTGAAATCAGCGGAGTGGAGGATCGCTTCAACGCATCCCTGGGAACGTATCACGATCTCC  
71 TGA AAAATCATTAAAGACAAGGACTTCTGGACAATGAGGAGAACGAGGACATTCTTGAGGACATTGT  
72 CCTACCCCTTACGTTGTTTGAAGATAGGGAGATGATTGAAGAACGCTTGAAAACCTACGCTCATCTCT  
73 TCGACGACAAAGTCATGAAACAGCTCAAGAGGCGCCGATATACAGGATGGGGGCGGCTGTCAAGAA  
74 AACTGATCAATGGGATCCGAGACAAGCAGAGTGGAAAGACAATCCTGGATTTTCTTAAGTCCGATGG  
75 ATTTGCCAACCCGGAACCTTCATT  
76



77

78

79 **Supplementary References**

- 80 1. Ewen-Campen, B. *et al.* Optimized strategy for in vivo Cas9-activation in *Drosophila*. *Proc.*  
81 *Natl. Acad. Sci.* 201707635 (2017). doi:10.1073/pnas.1707635114
- 82 2. Waters, A. J. *et al.* Rationally-engineered reproductive barriers using CRISPR & CRISPRa: an  
83 evaluation of the synthetic species concept in *Drosophila melanogaster*. *Sci. Transl. Med.*  
84 (2018). doi:10.1101/259010
- 85 3. Lin, S., Ewen-Campen, B., Ni, X., Housden, B. E. & Perrimon, N. In vivo transcriptional  
86 activation using CRISPR/Cas9 in *Drosophila*. *Genetics* **201**, 433–442 (2015).
- 87 4. Lindsley, D. L., Grell, E. H. & Bridges, C. B. (Calvin B. *Genetic variations of Drosophila*  
88 *melanogaster*. (1967).
- 89 5. Ryder, E., Hartl, D. L. & Wu, C. -tin. The DrosDel Collection: A Set of P-Element Insertions for  
90 Generating Custom Chromosomal Aberrations in *Drosophila melanogaster*. *Genetics* **167**,  
91 797–813 (2004).
- 92 6. Venken, K. J. T., He, Y., Hoskins, R. A. & Bellen, H. J. P[acman]: a BAC transgenic platform for  
93 targeted insertion of large DNA fragments in *D. melanogaster*. *Science* **314**, 1747–51 (2006).
- 94 7. Gratz, S. J. *et al.* Genome engineering of *Drosophila* with the CRISPR RNA-guided Cas9  
95 nuclease. *Genetics* **194**, 1029–1035 (2013).
- 96 8. Port, F., Chen, H. M., Lee, T. & Bullock, S. L. Optimized CRISPR/Cas tools for efficient germline  
97 and somatic genome engineering in *Drosophila*. *Proc. Natl. Acad. Sci. U. S. A.* **111**, E2967-76  
98 (2014).
- 99 9. Chavez, A. *et al.* Comparison of Cas9 activators in multiple species. *Nat. Methods* **13**, 563–7  
100 (2016).
- 101 10. Stern, D. Addgene: p{CFD4-3xP3::DsRed}. Available at: <https://www.addgene.org/86864/>.  
102 (Accessed: 26th February 2020)

103

104
